# Supplementary material for: Palmitoylation of Prolactin-Releasing Peptide Increased Affinity for and Activation of the GPR10, NPFF-R2 and NPFF-R1 Receptors: In Vitro Study
Source: MDPI journal article supplement (doi:10.3390/ijms22168904), 2021-08-18
Supplement: s1 [file s1]

## Supplementary data

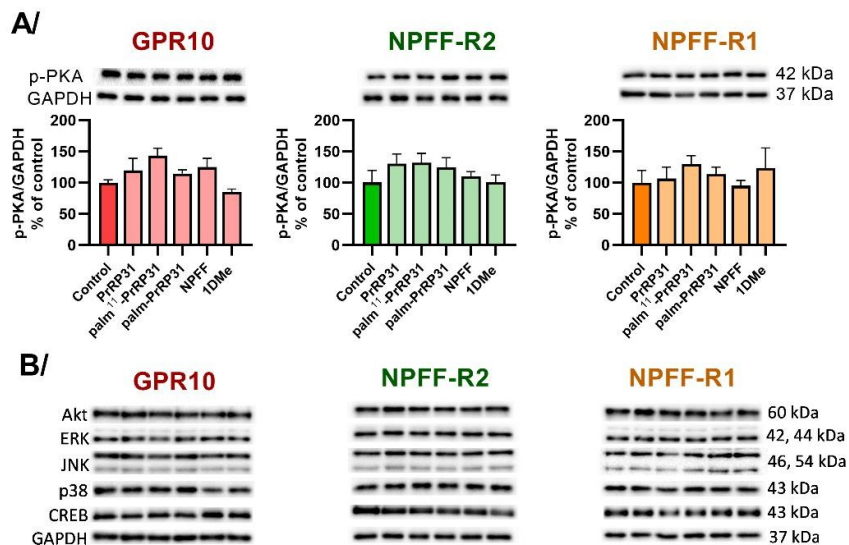

**Supplementary Figure S1.** Induction of (A) PKA phosphorylation after 5 minutes incubation at 37°C with peptides in final concentrations 10<sup>-6</sup> M in CHO-K1 cells expressing receptors GPR10, NPFF-R2 and NPFF-R1. Densitometric quantification was normalized to GAPDH and the phosphorylation level in the untreated control was standardized as 100% (B) total protein levels of tested signaling pathways.

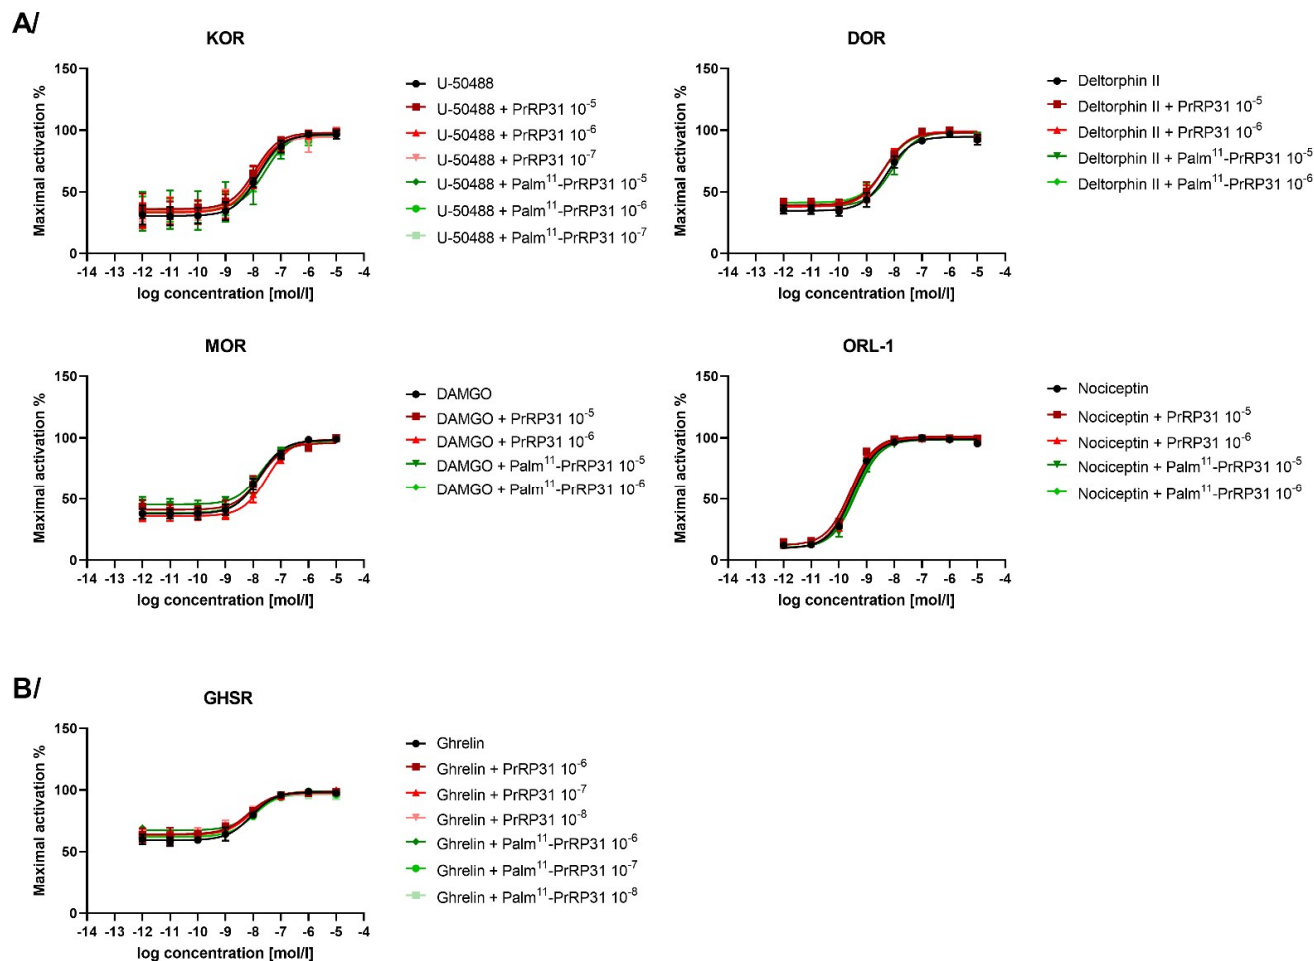

**Supplementary Figure S2.** Antagonist mode of FRET assay showing effect of PrRP31 and palm<sup>11</sup>-PrRP31 at (A) opioid receptors and (B) GHSR. Data are presented as mean  $\pm$  SEM and the experiments were performed in duplicates and repeated at least two times and analyzed using nonlinear regression
